# Supplementary material for: Global small RNA analysis in fast-growing Arabidopsis thaliana with elevated concentrations of ATP and sugars
Source: PubMed Central journal article supplement (PMC3925372; doi:10.1186/1471-2164-15-116), 2014-02-10
Supplement: 1471-2164-15-116-S1.pdf [file 1471-2164-15-116-S1.pdf]

**Additional file 1. Statistics of small RNA sequences from eight libraries.**

| Library     | Raw reads (R)<br>Total | Clean reads (C)        |                       | Mapped to genome (M)   |                       |
|-------------|------------------------|------------------------|-----------------------|------------------------|-----------------------|
|             |                        | Total<br>(C/R%)        | Unique<br>(C/R%)      | Total<br>(M/C%)        | Unique<br>(M/C%)      |
| <b>Leaf</b> |                        |                        |                       |                        |                       |
| WT          | 16,462,993             | 15,631,599<br>(94.95%) | 1,987,787<br>(12.07%) | 13,640,806<br>(87.26%) | 1,322,443<br>(66.53%) |
| <i>pap2</i> | 14,699,954             | 14,121,529<br>(96.07%) | 2,011,308<br>(13.68%) | 12,265,644<br>(86.86%) | 1,342,451<br>(66.75%) |
| OE7         | 18,345,272             | 17,331,077<br>(94.47%) | 2,024,161<br>(11.03%) | 13,388,975<br>(77.25%) | 922,738<br>(45.59%)   |
| OE21        | 16,738,094             | 16,169,858<br>(96.61%) | 2,176,249<br>(13.00%) | 12,597,144<br>(77.91%) | 1,015,795<br>(46.68%) |
| <b>Root</b> |                        |                        |                       |                        |                       |
| WT          | 13,154,174             | 12,500,900<br>(95.03%) | 1,690,713<br>(12.85%) | 9,678,185<br>(77.42%)  | 564,994<br>(33.42%)   |
| <i>pap2</i> | 16,444,289             | 15,579,209<br>(94.74%) | 2,114,466<br>(12.86%) | 11,472,399<br>(73.64%) | 618,737<br>(29.26%)   |
| OE7         | 15,990,223             | 15,314,996<br>(95.78%) | 1,590,360<br>(9.95%)  | 12,435,120<br>(81.20%) | 483,788<br>(30.42%)   |
| OE21        | 17,410,769             | 16,642,942<br>(95.59%) | 2,242,479<br>(12.88%) | 12,129,420<br>(72.88%) | 499,766<br>(22.29%)   |
