# Supplementary material for: Global small RNA analysis in fast-growing Arabidopsis thaliana with elevated concentrations of ATP and sugars
Source: PubMed Central journal article supplement (PMC3925372; doi:10.1186/1471-2164-15-116), 2014-02-10
Supplement: 1471-2164-15-116-S2.pdf [file 1471-2164-15-116-S2.pdf]

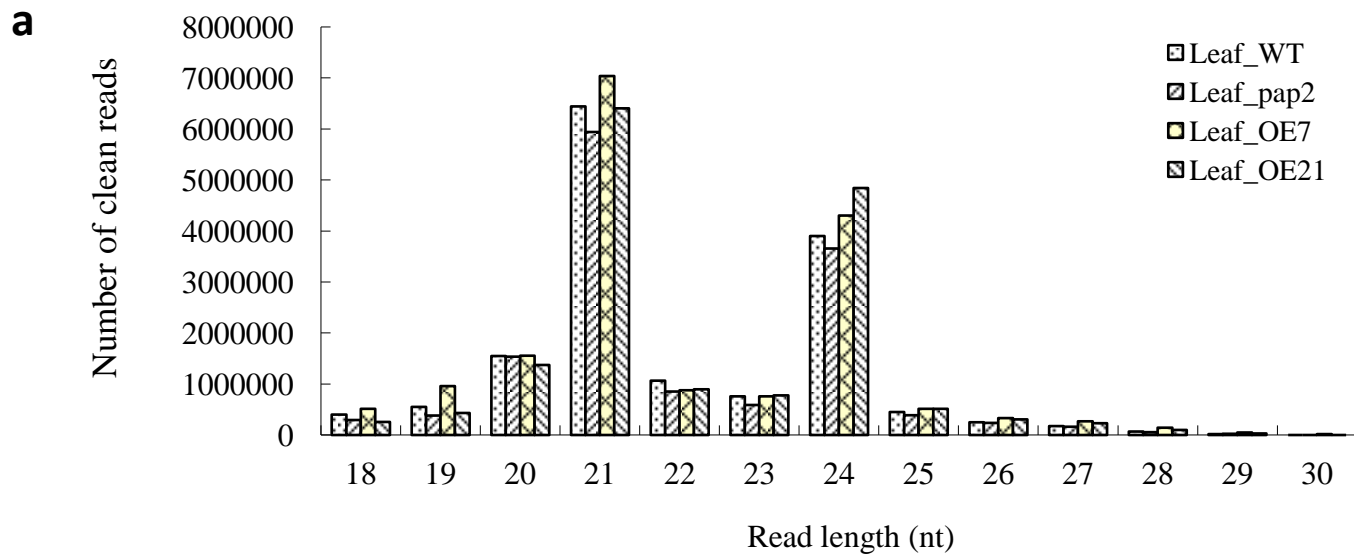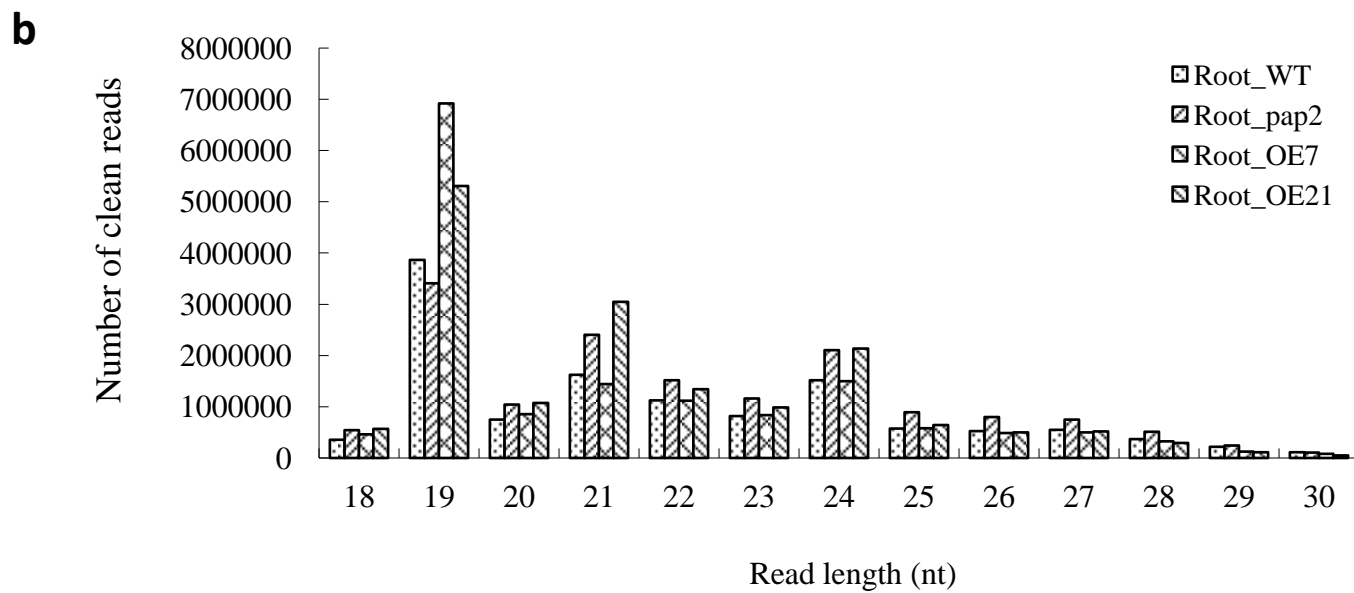

**Additional file 2:** Size distribution of small RNA sequences in various leaf (a) and root (b) samples.
