# Supplementary material for: Global small RNA analysis in fast-growing Arabidopsis thaliana with elevated concentrations of ATP and sugars
Source: PubMed Central journal article supplement (PMC3925372; doi:10.1186/1471-2164-15-116), 2014-02-10
Supplement: 1471-2164-15-116-S3.pdf [file 1471-2164-15-116-S3.pdf]

**Additional file 3. Classification of sRNAs in various samples.**

| <b>Total reads</b> | Leaf  | Leaf         | Leaf        | Leaf        | Root  | Root         | Root        | Root        |
|--------------------|-------|--------------|-------------|-------------|-------|--------------|-------------|-------------|
| Category           | WT%   | <i>pap2%</i> | OE7%        | OE21%       | WT%   | <i>pap2%</i> | OE7%        | OE21%       |
| exon_antisense     | 0.87  | 0.99         | <b>1.63</b> | <b>1.84</b> | 0.25  | 0.23         | 0.29        | <b>0.43</b> |
| exon_sense         | 2.33  | 2.39         | <b>1.98</b> | 2.29        | 1.76  | 1.62         | 1.9         | 1.57        |
| intron_antisense   | 0.2   | 0.23         | 0.2         | 0.26        | 0.06  | 0.06         | <b>0.03</b> | 0.07        |
| intron_sense       | 0.27  | 0.28         | 0.16        | 0.2         | 0.09  | 0.09         | <b>0.05</b> | 0.08        |
| miRNA              | 37.5  | 41.02        | 35.24       | 30.77       | 5.95  | 7.03         | <b>3.45</b> | 6.04        |
| rRNA               | 21.32 | 15.65        | 19.91       | 18.8        | 36.47 | 42.47        | 28.94       | 28.25       |
| repeat             | 12.39 | 12.85        | <b>7.77</b> | 8.67        | 3.87  | 4.15         | <b>1.97</b> | 2.86        |
| siRNA              | 1.78  | 2.68         | <b>3.96</b> | <b>8.99</b> | 0.39  | 0.54         | 0.57        | <b>6.08</b> |
| snRNA              | 0.06  | 0.05         | 0.07        | 0.06        | 0.19  | 0.22         | 0.22        | 0.17        |
| snoRNA             | 0.03  | 0.03         | 0.04        | 0.04        | 0.03  | 0.04         | <b>0.05</b> | 0.04        |
| tRNA               | 4.47  | 3.6          | <b>6.96</b> | 3.86        | 32.04 | 21.28        | 47.3        | 32.19       |
| unann              | 18.77 | 20.23        | 22.07       | 24.23       | 18.92 | 22.27        | 15.24       | 32.19       |
| Total              | 100   | 100          | 100         | 100         | 100   | 100          | 100         | 100         |

| <b>Unique reads</b> | Leaf  | Leaf         | Leaf  | Leaf  | Root  | Root         | Root  | Root  |
|---------------------|-------|--------------|-------|-------|-------|--------------|-------|-------|
| Category            | WT%   | <i>pap2%</i> | OE7%  | OE21% | WT%   | <i>pap2%</i> | OE7%  | OE21% |
| exon_antisense      | 2.22  | 2.16         | 1.7   | 1.67  | 0.89  | 0.82         | 0.65  | 0.63  |
| exon_sense          | 7.86  | 7.73         | 6.4   | 6.96  | 9.4   | 8.02         | 14.02 | 7.67  |
| intron_antisense    | 0.51  | 0.55         | 0.36  | 0.38  | 0.19  | 0.18         | 0.12  | 0.13  |
| intron_sense        | 0.56  | 0.57         | 0.42  | 0.43  | 0.28  | 0.24         | 0.23  | 0.18  |
| miRNA               | 0.16  | 0.15         | 0.14  | 0.13  | 0.1   | 0.08         | 0.1   | 0.08  |
| rRNA                | 6.91  | 6.19         | 7.85  | 6.57  | 13.45 | 12.94        | 12.49 | 11.12 |
| repeat              | 30.19 | 30.39        | 19.25 | 19.29 | 11.1  | 9.69         | 6.63  | 6.52  |
| siRNA               | 1.54  | 1.53         | 2.07  | 2.33  | 0.5   | 0.56         | 0.61  | 0.8   |
| snRNA               | 0.15  | 0.13         | 0.17  | 0.13  | 0.31  | 0.3          | 0.4   | 0.25  |
| snoRNA              | 0.1   | 0.09         | 0.12  | 0.11  | 0.1   | 0.1          | 0.15  | 0.11  |
| tRNA                | 1.08  | 1.05         | 1.28  | 0.96  | 2.75  | 2.68         | 2.7   | 2.61  |
| unann               | 48.73 | 49.46        | 60.23 | 61.03 | 60.92 | 64.38        | 61.9  | 69.9  |
| Total               | 100   | 100          | 100   | 100   | 100   | 100          | 100   | 100   |

Numbers in bold mean significant changes in OE versus WT, p-value < 0.05 and fold change log<sub>2</sub> (OE/WT) ≥ 1 or ≤ -1.
