# Supplementary material for: Global small RNA analysis in fast-growing Arabidopsis thaliana with elevated concentrations of ATP and sugars
Source: PubMed Central journal article supplement (PMC3925372; doi:10.1186/1471-2164-15-116), 2014-02-10
Supplement: 1471-2164-15-116-S5.pdf [file 1471-2164-15-116-S5.pdf]

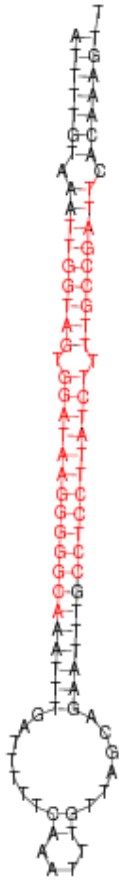

Leaf\_miRNA0001  
Root\_miRNA0001

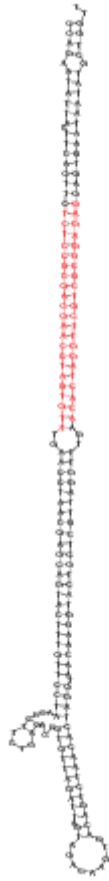

Leaf\_miRNA0002  
Root\_miRNA0002

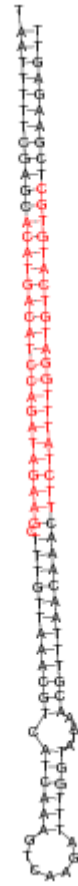

Leaf\_miRNA0003

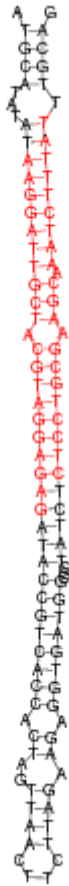

Leaf\_miRNA0004

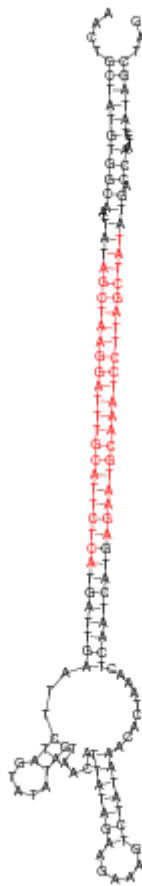

Leaf\_miRNA0005

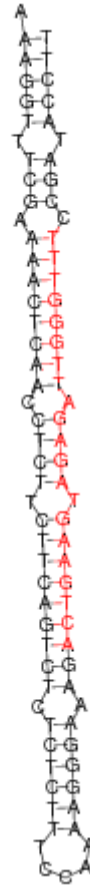

Leaf\_miRNA0006

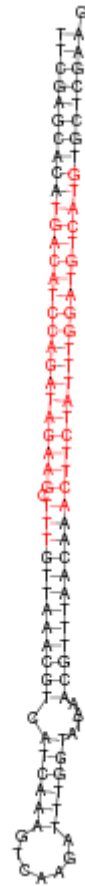

Leaf\_miRNA0007

**Additional file 5. Structures of novel miRNAs in leaf and root.** The mature miRNAs were shown in red letters.
