# Supplementary material for: Global small RNA analysis in fast-growing Arabidopsis thaliana with elevated concentrations of ATP and sugars
Source: PubMed Central journal article supplement (PMC3925372; doi:10.1186/1471-2164-15-116), 2014-02-10
Supplement: 1471-2164-15-116-S6.pdf [file 1471-2164-15-116-S6.pdf]

**Additional file 6. List of novel miRNAs and their predicted targets**

| Name                           | WT   | <i>pap2</i> | OE7        | OE21       | Predicted target genes | Gene family                                       |
|--------------------------------|------|-------------|------------|------------|------------------------|---------------------------------------------------|
| Leaf_miRNA0001_5p <sup>a</sup> | 583  | 501         | 409        | 396        | AT1G80740              | Chromomethylase 1(CMT1)                           |
| Root_miRNA0001_5p <sup>a</sup> | 403  | 645         | 505        | 706        | AT1G80740              | Chromomethylase 1(CMT1)                           |
| Leaf_miRNA0002_5p <sup>b</sup> | 422  | 0           | <b>0</b>   | <b>0</b>   | AT3G30820              | Retrotransposon ORF-1 protein                     |
| Root_miRNA0002_3p <sup>b</sup> | 108  | 90          | <b>0</b>   | <b>0</b>   | AT3G30820              | Retrotransposon ORF-1 protein                     |
| Leaf_miRNA0003_3p              | 0    | 3485        | 0          | 0          | AT3G59230              | F-box family protein                              |
|                                |      |             |            |            | AT5G27750              | F-box family protein                              |
| Leaf_miRNA0004_5p              | 122  | 170         | 142        | 83         | AT1G11580              | Methylesterase PCR A (PMEPCRA)                    |
| Leaf_miRNA0005_5p              | 47   | 81          | <b>95</b>  | <b>139</b> | AT4G28010              | Pentatricopeptide (PPR) repeat-containing protein |
| Leaf_miRNA0006_3p              | 0    | 0           | <b>364</b> | <b>315</b> | AT1G62260              | Pentatricopeptide (PPR) repeat-containing protein |
| Leaf_miRNA0007_5p              | 1920 | 0           | <b>0</b>   | <b>0</b>   | AT1G58310              | F-box family protein                              |
|                                |      |             |            |            | AT3G59230              | F-box family protein                              |
|                                |      |             |            |            | AT4G00320              | F-box family protein                              |
|                                |      |             |            |            | AT5G41840              | F-box family protein                              |

<sup>a,b</sup> Novel miRNAs from Leaf and root represented by the same letter are identical. Numbers in bold mean significant changes in OE versus WT, p-value < 0.05 and fold change log<sub>2</sub> (OE/WT) ≥ 1 or fold change log<sub>2</sub> (OE/WT) ≤ -1. The reads cut off is 100 and all reads were normalized.
