# Supplementary material for: Global small RNA analysis in fast-growing Arabidopsis thaliana with elevated concentrations of ATP and sugars
Source: PubMed Central journal article supplement (PMC3925372; doi:10.1186/1471-2164-15-116), 2014-02-10
Supplement: 1471-2164-15-116-S13.pdf [file 1471-2164-15-116-S13.pdf]

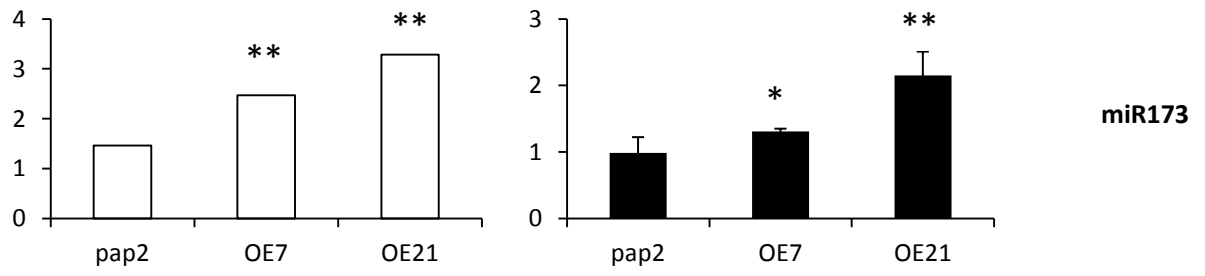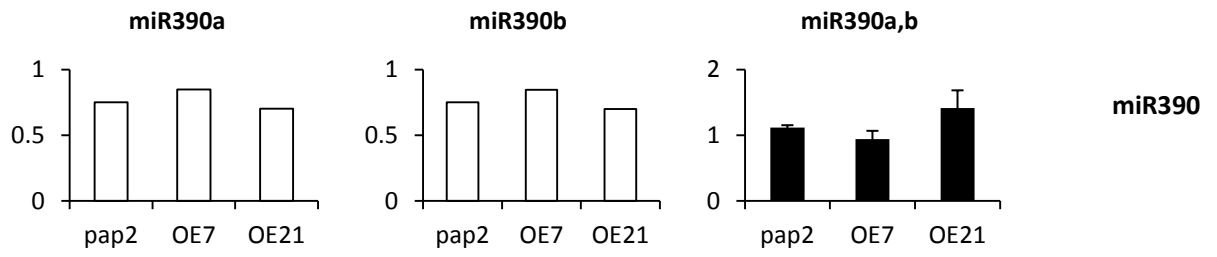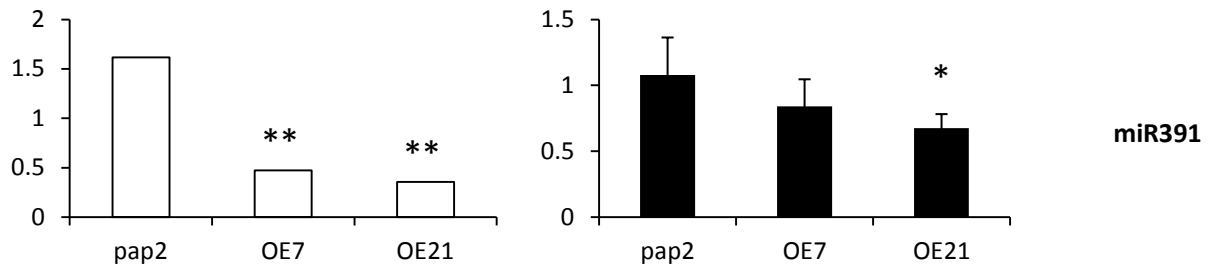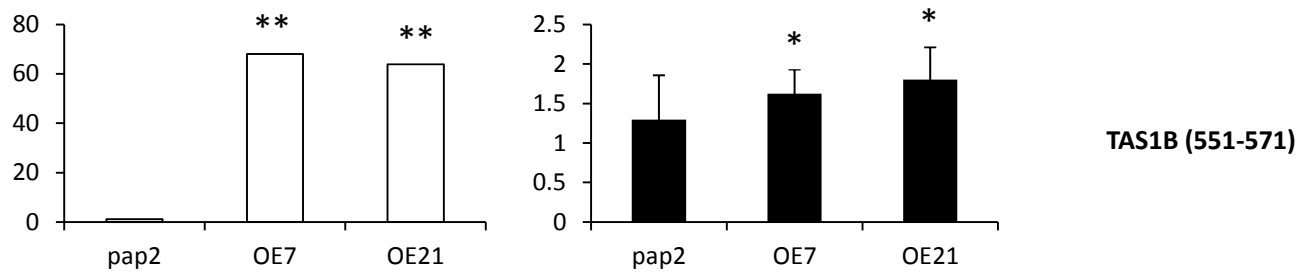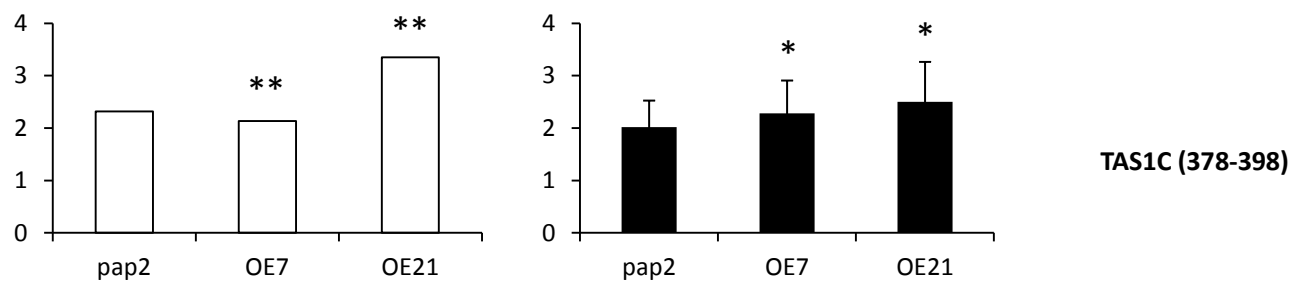

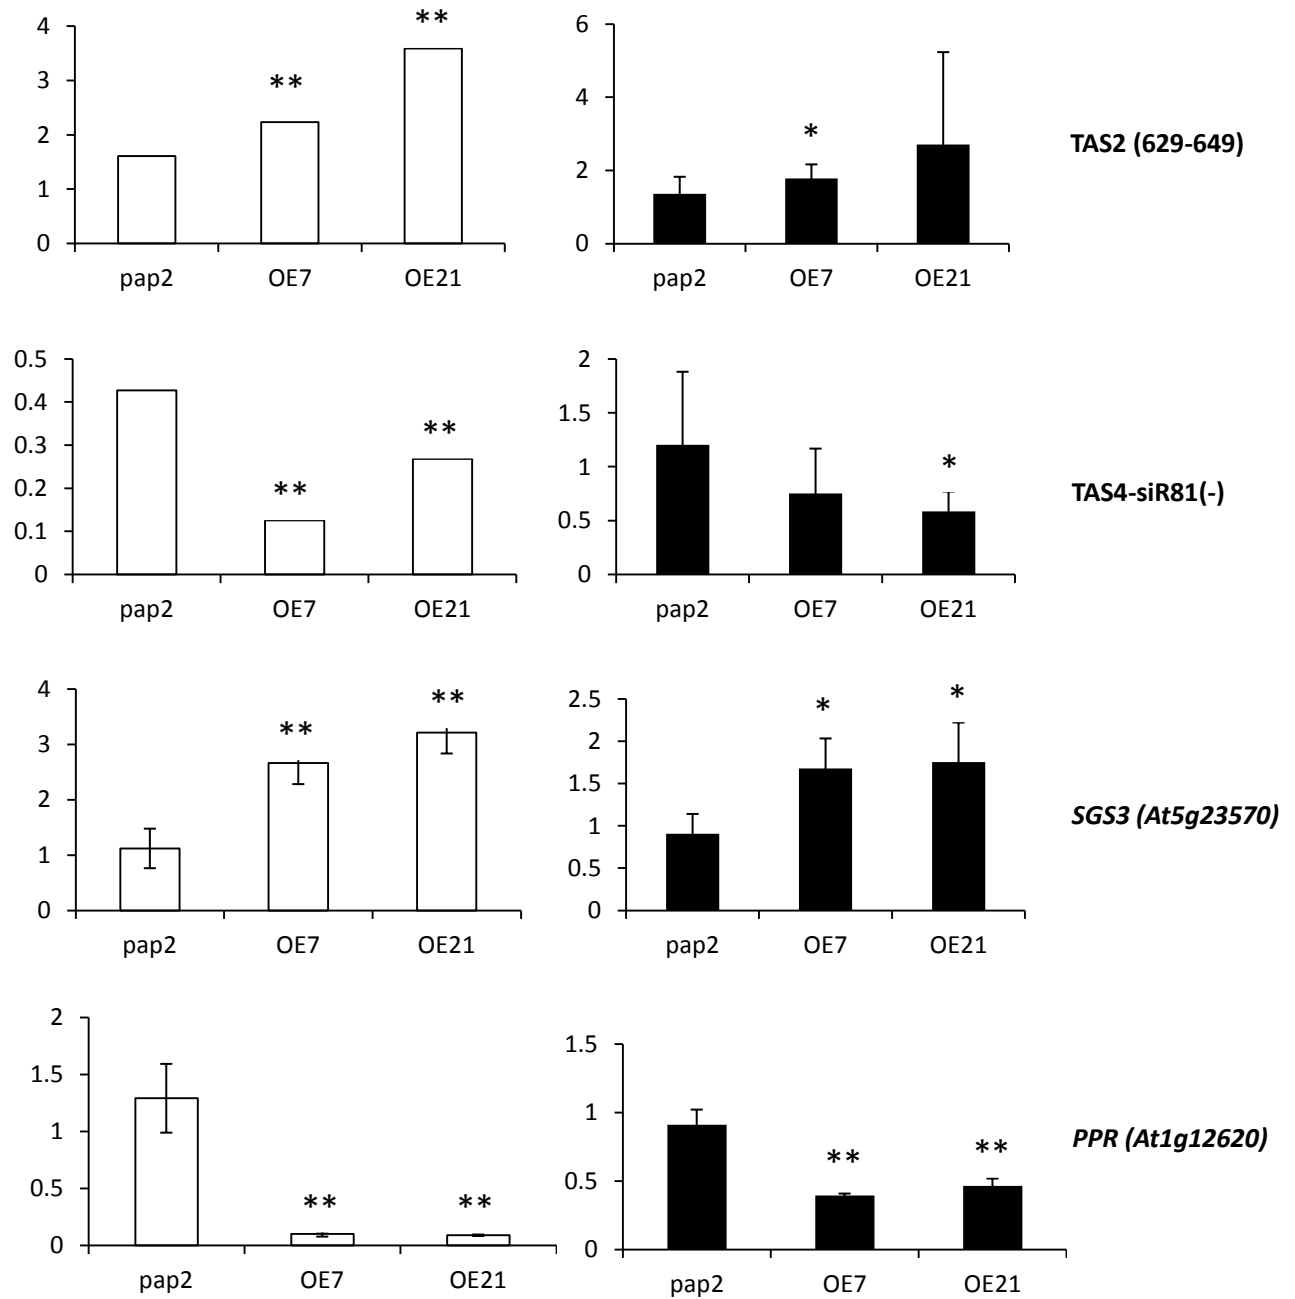

**Additional file 15. Validation of small RNAs and microarray data by qRT-PCR.** All the values are calculated by fold change (*pap2*/WT, OE7/WT or OE21/WT). Columns in white indicate small RNAs reads or microarray data, black columns indicate real-time RT-PCR data. Asterisks indicate significant difference compared with WT. \* P < 0.05, \*\* P < 0.01.
