# Supplementary material for: Global small RNA analysis in fast-growing Arabidopsis thaliana with elevated concentrations of ATP and sugars
Source: PubMed Central journal article supplement (PMC3925372; doi:10.1186/1471-2164-15-116), 2014-02-10
Supplement: 1471-2164-15-116-S15.pdf [file 1471-2164-15-116-S15.pdf]

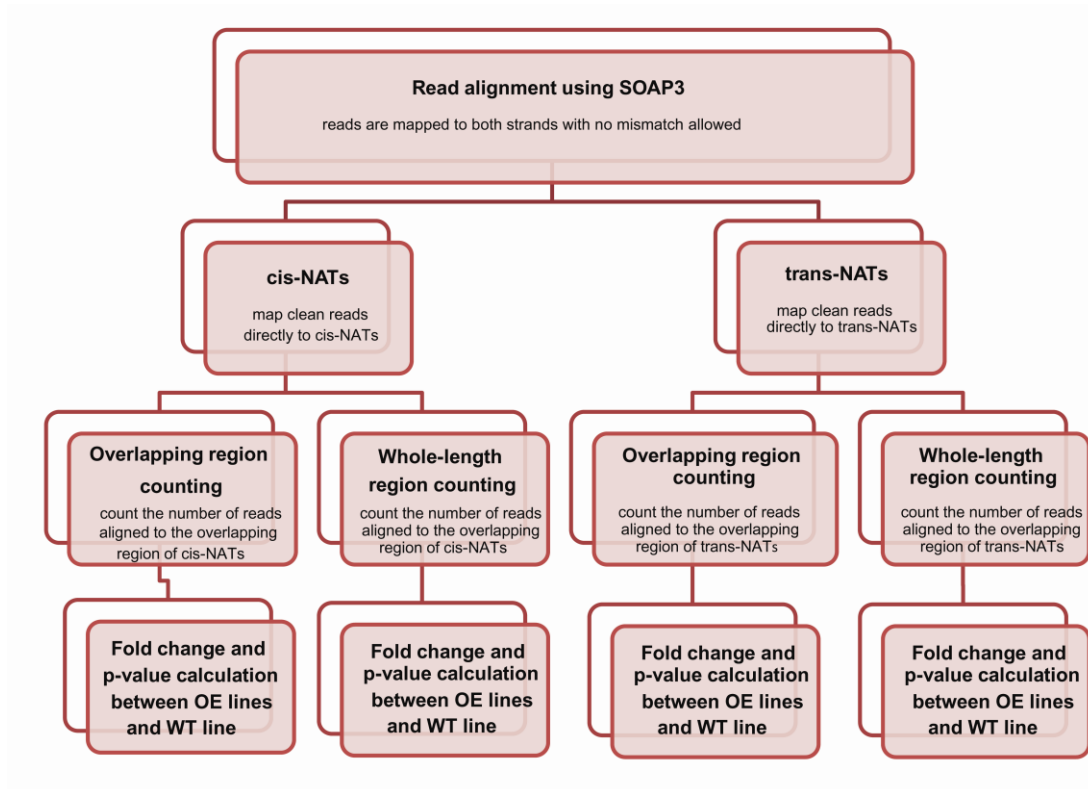

**Additional file 14.** Flowchart of small RNAs mapped to cis-NATs and trans-NATs in Arabidopsis by SOAP3.
